# Supplementary material for: Mass Spectrometry Guided Discovery and Design of Novel Asperphenamate Analogs From Penicillium astrolabium Reveals an Extraordinary NRPS Flexibility
Source: PubMed Central journal article supplement (PMC7843940; doi:10.3389/fmicb.2020.618730), 2021-01-15

## Supplementary information

### Mass spectrometry guided discovery and design of novel Asperphenamate analogues from *Penicilium astrolabium*

Karolina Subko<sup>1</sup>, Xinhui Wang<sup>1</sup>, Frederik H. Nielsen<sup>1</sup>, Charlotte H. Gotfredsen<sup>2</sup>, Francisca Vicente<sup>3</sup>, Jens C. Frisvad<sup>1</sup>, and Thomas O. Larsen<sup>1\*</sup>

<sup>1</sup>Department of Biotechnology and Biomedicine, Technical University of Denmark, Kgs. Lyngby, Denmark;

<sup>2</sup>Department of Chemistry, Technical University of Denmark, Kgs. Lyngby, Denmark;

<sup>3</sup>Fundación MEDINA, Avda del Conocimiento, 34, 18100 Armilla, Granada, Spain;

\* **Correspondence:** Thomas O. Larsen, tol@bio.dtu.dk

#### Table of contents

**Supplementary Table S1:** m/z values of protonated adduct of potential Asperphenamate analogues.

**Supplementary Table S2:** NMR data for Asperphenamate Y (**4**).

**Supplementary Table S3:** NMR data for Asperphenamate W (**12**).

**Supplementary Table S4:** NMR data for Asperphenamate L (**13**).

**Supplementary Table S5:** NMR data for Asperphenamate F (**3**) and Asperphenidine F1 (**3a**).

**Supplementary Figure S1:** NMR spectra for Asperphenamate F (**3**).

**Supplementary Figure S2:** NMR spectra for Asperphenamate Y (**4**).

**Supplementary Figure S3:** NMR spectra for Asperphenamate W (**12**).

**Supplementary Figure S4:** NMR spectra for Asperphenamate L (**13**).

**Supplementary Figure S5:** <sup>1</sup>H NMR spectrum for Asperphenidine F1 (**3a**).

**Supplementary Figure S6:** MS/MS spectra and assignment of natural Asperphenamate analogues.

**Supplementary Figure S7:** MS/MS spectra and assignment of Asperphenidines Y1-Y2, W1-W2.

**Supplementary Figure S8:** MS/MS spectra and assignment of chloro- and bromo-phenylalanine asperphenamate derivatives

**Supplementary Figure S9:** MS/MS spectra and assignment of amino- and nitro -phenylalanine asperphenamate and asperphenidine derivatives.

**Supplementary Figure S10:** BPCs of selected fungi from *Brevicompecta* section.

**Supplementary Table 1: m/z values of protonated adduct of potential asperphenamate analogues.**

| No. | AA                     | 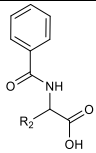 |  |                                                         |                                                                                                                                          |                                                        |                                                                                                                                          |                                                                                                                                                                                                                                                                                                                                                                                                                                                 |          |  |          |
|-----|------------------------|-----------------------------------------------------------------------------------|-----------------------------------------------------------------------------------|------------------------------------------------------------------------------------------------------------------------------------------|------------------------------------------------------------------------------------------------------------------------------------------|------------------------------------------------------------------------------------------------------------------------------------------|------------------------------------------------------------------------------------------------------------------------------------------|------------------------------------------------------------------------------------------------------------------------------------------------------------------------------------------------------------------------------------------------------------------------------------------------------------------------------------------------------------------------------------------------------------------------------------------------------------------------------------------------------------------------------------|----------|-------------------------------------------------------------------------------------|----------|
|     |                        | (A) R <sub>2</sub> = AA                                                           | (B) R <sub>4</sub> = AA                                                           | (C) R <sub>2</sub> = AA R <sub>4</sub> = Phe<br>(D) R <sub>2</sub> = Phe R <sub>4</sub> = AA<br>(E) R <sub>2</sub> = R <sub>4</sub> = AA | (F) R <sub>2</sub> = AA R <sub>4</sub> = Phe<br>(G) R <sub>2</sub> = Phe R <sub>4</sub> = AA<br>(H) R <sub>2</sub> = R <sub>4</sub> = AA | (I) R <sub>2</sub> = AA R <sub>4</sub> = Phe<br>(J) R <sub>2</sub> = Phe R <sub>4</sub> = AA<br>(M) R <sub>2</sub> = R <sub>4</sub> = AA | (K) R <sub>2</sub> = AA R <sub>4</sub> = Phe<br>(L) R <sub>2</sub> = Phe R <sub>4</sub> = AA<br>(N) R <sub>2</sub> = R <sub>4</sub> = AA | (O) R <sub>1</sub> = N R <sub>2</sub> = AA R <sub>3</sub> = CH R <sub>4</sub> = Phe<br>(P) R <sub>1</sub> = N R <sub>2</sub> = Phe R <sub>3</sub> = CH R <sub>4</sub> = AA<br>(Q) R <sub>1</sub> = CH R <sub>2</sub> = AA R <sub>3</sub> = N R <sub>4</sub> = Phe<br>(R) R <sub>1</sub> = CH R <sub>2</sub> = Phe R <sub>3</sub> = N R <sub>4</sub> = AA<br>(S) R <sub>1</sub> = R <sub>3</sub> = N R <sub>2</sub> = AA, R <sub>4</sub> = Phe<br>(T) R <sub>1</sub> = R <sub>3</sub> = N R <sub>2</sub> = Phe, R <sub>4</sub> = AA |          |                                                                                     |          |
| 1   | Phe                    | 270.1125                                                                          | 256.1332                                                                          | 507.2278                                                                                                                                 |                                                                                                                                          | 403.2016                                                                                                                                 |                                                                                                                                          | 445.2122                                                                                                                                                                                                                                                                                                                                                                                                                                                                                                                           |          | 508.2231                                                                            | 509.2183 |
| 2   | Tyr                    | 285.1001                                                                          | 272.1281                                                                          | 523.2227                                                                                                                                 | 539.2177                                                                                                                                 | 419.1965                                                                                                                                 | 435.1914                                                                                                                                 | 461.2071                                                                                                                                                                                                                                                                                                                                                                                                                                                                                                                           | 477.2020 | 524.2180                                                                            | 525.2132 |
| 3   | Trp                    | 309.1234                                                                          | 295.1441                                                                          | 546.2387                                                                                                                                 | 585.2496                                                                                                                                 | 442.2125                                                                                                                                 | 481.2234                                                                                                                                 | 484.2231                                                                                                                                                                                                                                                                                                                                                                                                                                                                                                                           | 523.2340 | 547.2340                                                                            | 548.2292 |
| 4   | Leu/Ile                | 236.1281                                                                          | 222.1489                                                                          | 473.2435                                                                                                                                 | 439.2591                                                                                                                                 | 369.2173                                                                                                                                 | 335.2329                                                                                                                                 | 411.2278                                                                                                                                                                                                                                                                                                                                                                                                                                                                                                                           | 377.2435 | 474.2387                                                                            | 475.2340 |
| 5   | Ala                    | 194.0812                                                                          | 180.1019                                                                          | 431.1965                                                                                                                                 | 355.1652                                                                                                                                 | 327.1703                                                                                                                                 | 251.1390                                                                                                                                 | 369.1809                                                                                                                                                                                                                                                                                                                                                                                                                                                                                                                           | 293.1496 | 432.1918                                                                            | 433.1870 |
| 6   | Gly                    | 180.0655                                                                          | 166.0863                                                                          | 417.1809                                                                                                                                 | 327.1339                                                                                                                                 | 313.1547                                                                                                                                 | 223.1077                                                                                                                                 | 355.1652                                                                                                                                                                                                                                                                                                                                                                                                                                                                                                                           | 265.1183 | –                                                                                   | –        |
| 7   | His                    | 260.1030                                                                          | 246.1237                                                                          | 497.2183                                                                                                                                 | 487.2088                                                                                                                                 | 393.1921                                                                                                                                 | 383.1826                                                                                                                                 | 435.2027                                                                                                                                                                                                                                                                                                                                                                                                                                                                                                                           | 425.1932 | 498.2136                                                                            | 499.2088 |
| 8   | Val                    | 222.1125                                                                          | 208.1332                                                                          | 459.2278                                                                                                                                 | 411.2278                                                                                                                                 | 355.2016                                                                                                                                 | 307.2016                                                                                                                                 | 397.2122                                                                                                                                                                                                                                                                                                                                                                                                                                                                                                                           | 349.2122 | 460.2231                                                                            | 461.2183 |
| 9   | Met                    | 254.0845                                                                          | 240.1053                                                                          | 491.1999                                                                                                                                 | 475.1720                                                                                                                                 | 387.1737                                                                                                                                 | 371.1458                                                                                                                                 | 429.1843                                                                                                                                                                                                                                                                                                                                                                                                                                                                                                                           | 413.1563 | 492.1952                                                                            | 493.1904 |
| 11  | Cys                    | 226.0532                                                                          | 212.0740                                                                          | 463.1686                                                                                                                                 | 419.1094                                                                                                                                 | 359.1424                                                                                                                                 | 315.0832                                                                                                                                 | 401.1530                                                                                                                                                                                                                                                                                                                                                                                                                                                                                                                           | 357.0937 | –                                                                                   | –        |
| 12  | Ser                    | 210.0761                                                                          | 196.0968                                                                          | 447.1914                                                                                                                                 | 387.1551                                                                                                                                 | 343.1652                                                                                                                                 | 283.1288                                                                                                                                 | 385.1758                                                                                                                                                                                                                                                                                                                                                                                                                                                                                                                           | 325.1394 | –                                                                                   | –        |
| 13  | Thr                    | 224.0917                                                                          | 210.1125                                                                          | 461.2071                                                                                                                                 | 415.1864                                                                                                                                 | 357.1809                                                                                                                                 | 311.1601                                                                                                                                 | 399.0914                                                                                                                                                                                                                                                                                                                                                                                                                                                                                                                           | 353.1707 | –                                                                                   | –        |
| 14  | Asn                    | 237.0870                                                                          | 223.1077                                                                          | 474.2023                                                                                                                                 | 411.1769                                                                                                                                 | 370.1761                                                                                                                                 | 337.1506                                                                                                                                 | 412.1867                                                                                                                                                                                                                                                                                                                                                                                                                                                                                                                           | 379.1612 | –                                                                                   | –        |
| 15  | Gln                    | 251.1026                                                                          | 237.1234                                                                          | 488.2180                                                                                                                                 | 469.2082                                                                                                                                 | 384.1918                                                                                                                                 | 365.1819                                                                                                                                 | 426.2023                                                                                                                                                                                                                                                                                                                                                                                                                                                                                                                           | 407.1925 | –                                                                                   | –        |
| 16  | Lys                    | 251.1390                                                                          | 237.1598                                                                          | 488.2544                                                                                                                                 | 469.2809                                                                                                                                 | 384.2282                                                                                                                                 | 365.2547                                                                                                                                 | 426.2387                                                                                                                                                                                                                                                                                                                                                                                                                                                                                                                           | 407.2653 | –                                                                                   | –        |
| 17  | Arg                    | 279.1452                                                                          | 265.1659                                                                          | 516.2605                                                                                                                                 | 525.2932                                                                                                                                 | 412.2343                                                                                                                                 | 421.2670                                                                                                                                 | 454.2449                                                                                                                                                                                                                                                                                                                                                                                                                                                                                                                           | 463.2776 | –                                                                                   | –        |
| 18  | Pro                    | 220.0968                                                                          | 206.0968                                                                          | 457.2122                                                                                                                                 | 407.1965                                                                                                                                 | 353.1860                                                                                                                                 | 277.1547                                                                                                                                 | 395.1965                                                                                                                                                                                                                                                                                                                                                                                                                                                                                                                           | 345.1809 | –                                                                                   | –        |
| 19  | Glu                    | 252.0866                                                                          | 238.1074                                                                          | 489.2020                                                                                                                                 | 471.1762                                                                                                                                 | 385.1758                                                                                                                                 | 337.1500                                                                                                                                 | 427.1864                                                                                                                                                                                                                                                                                                                                                                                                                                                                                                                           | 409.1605 | –                                                                                   | –        |
| 20  | Asp                    | 238.0710                                                                          | 224.0917                                                                          | 475.1864                                                                                                                                 | 443.1449                                                                                                                                 | 371.1601                                                                                                                                 | 339.1187                                                                                                                                 | 413.1707                                                                                                                                                                                                                                                                                                                                                                                                                                                                                                                           | 381.1292 | –                                                                                   | –        |
| 21  | p-Cl-Phe               | 304.0735                                                                          | 290.0942                                                                          | 541.1889                                                                                                                                 | 575.1499                                                                                                                                 | 437.1626                                                                                                                                 | 471.1237                                                                                                                                 | 479.1732                                                                                                                                                                                                                                                                                                                                                                                                                                                                                                                           | 513.1542 | 542.1841                                                                            | 543.1794 |
| 22  | p-Br-Phe               | 348.0230                                                                          | 334.0437                                                                          | 585.1383                                                                                                                                 | 663.0489                                                                                                                                 | 481.1121                                                                                                                                 | 559.0226                                                                                                                                 | 523.1227                                                                                                                                                                                                                                                                                                                                                                                                                                                                                                                           | 601.0332 | 586.1336                                                                            | 587.1288 |
| 23  | p-NH <sub>2</sub> -Phe | 285.1234                                                                          | 271.1441                                                                          | 522.2387                                                                                                                                 | 537.2496                                                                                                                                 | 418.2125                                                                                                                                 | 433.2234                                                                                                                                 | 460.2231                                                                                                                                                                                                                                                                                                                                                                                                                                                                                                                           | 494.1841 | 523.2340                                                                            | 524.2292 |
| 24  | p-NO <sub>2</sub> -Phe | 315.0978                                                                          | 301.1183                                                                          | 552.2129                                                                                                                                 | 597.1980                                                                                                                                 | 448.1867                                                                                                                                 | 463.1976                                                                                                                                 | 490.1973                                                                                                                                                                                                                                                                                                                                                                                                                                                                                                                           | 535.1823 | 553.2082                                                                            | 554.2034 |

**Supplementary Table S2:** NMR data for Asperphenamate Y (**4**) in chloroform (CDCl<sub>3</sub>).

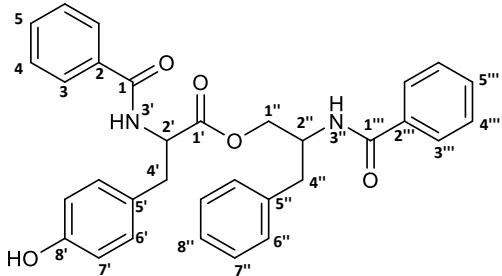

| No.  | $\delta_H$ , mult. (J in Hz)                 | $\delta_C$ | COSY          | H2BC                 | HMBC                           |
|------|----------------------------------------------|------------|---------------|----------------------|--------------------------------|
| 1    |                                              | 167.7      |               |                      |                                |
| 2    |                                              | 133.4      |               |                      |                                |
| 3    | 7.65, m                                      | 127.2      | 4             | C-4                  | C-1, C-3, C-5,                 |
| 4    | 7.39, m                                      | 128.8      | 3, 5          | C-3, C-5             | C-2, C-4                       |
| 5    | 7.5, tt (7.4, 1.2)                           | 132.2      | 4             | C-4                  | C-3                            |
| 1'   |                                              | 172.2      |               |                      |                                |
| 2'   | 4.87, d (6.7)                                | 54.8       | 3', 4'        | C-4'                 | C-1, C-1', C-4', C-5'          |
| 3'   | 6.59, d (6.6)                                |            | 2'            | C-2'                 | C-1, <u>C-1'</u> , <u>C-4'</u> |
| 4'   | 3.20, dd (14.0, 6.5)<br>3.14, dd (14.0, 6.9) | 36.9       | 2'            | C-2'                 | C-1', C-2', C-5', C-6'         |
| 5'   |                                              | 127.6      |               |                      |                                |
| 6'   | 7.05, m                                      | 130.5      | 7'            | C-7'                 | C-4', C-6', <u>C-7'</u> , C-8' |
| 7'   | 6.76, m                                      | 116.0      | 6'            | C-6'                 | C-5', C-7', C-8'               |
| 8'   |                                              | 155.3      |               |                      |                                |
| 1''  | 4.50, dd (11.4, 3.6)<br>4.04, dd (11.4, 4.5) | 65.5       | 2''           | C-2''                | C-1', C-4'', C-2''             |
| 2''  | 4.60, m                                      | 50.6       | 1'', 3'', 4'' | <u>C-1''</u> , C-4'' |                                |
| 3''  | 6.71, d (8.4)                                |            | 2''           | C-2''                | C-1''                          |
| 4''  | 3.01, dd(13.9, 6.5)<br>2.91, dd (13.9, 8.2)  | 37.4       | 2''           | C-2''                | C-1'' , C-2'', C-5'', C-6''    |
| 5''  |                                              | 137.1      |               |                      |                                |
| 6''  | 7.22, m                                      | 129.5      | 7''           | C-7''                | C-4'',C- 8''                   |
| 7''  | 7.31, m                                      | 128.9      | 6'', 8''      | C-6'', C-8''         | C-5'', C-7'', C-6''            |
| 8''  | 7.24, m                                      | 127.0      | 7''           | C-7''                | C-6''                          |
| 1''' |                                              | 167.8      |               |                      |                                |
| 2''' |                                              | 134.1      |               |                      |                                |
| 3''' | 7.68, m                                      | 127.3      | 4'''          | C-4'''               | C-1''', C-3''', C-5'''         |
| 4''' | 7.31, m                                      | 128.6      | 3''', 5'''    | C-3''', C-5'''       | C-2''', C-4'''                 |

Weak correlations are underlined.

**Supplementary Table S3:** NMR data for Asperphenamate W (**12**) in chloroform (CDCl<sub>3</sub>).

| No.  | $\delta_H$ , mult. (J in Hz)                 | $\delta_C$ | COSY          | H2BC           | HMBC                                     |
|------|----------------------------------------------|------------|---------------|----------------|------------------------------------------|
| 1    |                                              | 167.6      |               |                |                                          |
| 2    |                                              | 133.5      |               |                |                                          |
| 3    | 7.63, m                                      | 127.3      | 4             | C-4            | C-1, C-3, C-5                            |
| 4    | 7.29, m                                      | 128.6      | 3, 5          | C-3, C-5       | C-2, <u>C-3</u> , C-4                    |
| 5    | 7.48, t (7.4)                                | 132.1      | 4             | C-4            | C-3, <u>C-4</u>                          |
| 1'   |                                              | 172.5      |               |                |                                          |
| 2'   | 5.04, q (6.5)                                | 54.3       | 3', 4'        | C-4'           | C-1, C-1', C-4', C-5'                    |
| 3'   | 6.69, d (6.4)                                |            | 2'            |                | C-1, <u>C-1'</u> , C-2', C-4'            |
| 4'   | 3.43, d (6.0)                                | 27.7       | 2'            | C-2'           | C-1', C-2', C-5', C-6', C-13'            |
| 5'   |                                              | 110.1      |               |                |                                          |
| 6'   |                                              | 127.5      |               |                |                                          |
| 7'   | 7.64, m                                      | 118.7      | 8'            | C-8'           | <u>C-5'</u> , C-9', C-11'                |
| 8'   | 7.12, t (7.4)                                | 120.1      | 7', 9'        | C-7', C-9'     | C-6', C-10'                              |
| 9'   | 7.20, m                                      | 122.7      | 8', 10'       | C-8', C-10'    | C-7', C-11'                              |
| 10'  | 7.33, d (7.9)                                | 111.6      | 9'            | C-9'           | C-6', C-8'                               |
| 11'  |                                              | 136.4      |               |                |                                          |
| 12'  | 8.06, s                                      |            | 13'           |                | <u>C-5'</u> , <u>C-6'</u> , <u>C-13'</u> |
| 13'  | 7.06, d (2.2)                                | 123.1      | 12'           |                | <u>C-4</u> , C-5', C-6', C-11'           |
| 1''  | 4.46, dd (11.6, 3.6)<br>4.06, dd (11.6, 4.6) | 65.4       | 1'', 2''      | C-2'''*        | C-1', <u>C-2''</u> , <u>C-4''</u>        |
| 2''  | 4.55, m                                      | 50.6       | 1'', 3'', 4'' | C-1'', C-4''   | <u>C-1''</u>                             |
| 3''  | 6.59 d (8.4)                                 |            | 2''           |                | <u>C-1''</u> , <u>C-2''</u> , C-1'''     |
| 4''  | 2.94, dd (13.6, 6.7)<br>2.81, dd (13.6, 8.4) | 37.3       | 2'', 4''      | C-2''          | C-1'', C-2'', C-5'', C-6''               |
| 5''  |                                              | 137.4      |               |                |                                          |
| 6''  | 7.18, s (7.6)                                | 129.5      | 7''           | C-7''          | C-4'', C-6'', <u>C-7''</u> , C-8''       |
| 7''  | 7.36, t (7.8)                                | 128.7      | 6'', 8''      | C-6'', C-8''   | 5'', 6'', 7''                            |
| 8''  | 7.23, m                                      | 126.9      | 7''           | C-7''          | C-6'', C-7''                             |
| 1''' |                                              | 167.4      |               |                |                                          |
| 2''' |                                              | 134.4      |               |                |                                          |
| 3''' | 7.63, m                                      | 127.2      | 4'''          | C-4'''         | C-1''', C-3''', C-5'''                   |
| 4''' | 7.29, m                                      | 128.8      | 3''', 5'''    | C-3''', C-5''' | C-2''', C-4'''                           |
| 5''' | 7.43, t (7.4)                                | 131.5      | 4'''          | C-4'''         | C-3''', <u>C-4'''</u>                    |

Weak correlations are underlined.

**Supplementary Table S4:** NMR data for Asperphenamate L (**13**) in chloroform (CDCl<sub>3</sub>).

| No.  | $\delta_H$ , mult. ( <i>J</i> in Hz)         | $\delta_C$ | COSY                | HMBC                         |
|------|----------------------------------------------|------------|---------------------|------------------------------|
| 1    |                                              | 167.8      |                     |                              |
| 2    |                                              | 133.3      |                     |                              |
| 3    | 7.72, m                                      | 127.1      | C-4                 | C-1, C-3, C-5                |
| 4    | 7.41, m                                      | 128.6      | C-3, C-5            | C-2, C-4                     |
| 5    | 7.52, m                                      | 132.2      | C-4                 | C-3, <u>C-4</u>              |
| 1'   |                                              | 173.2      |                     |                              |
| 2'   | 4.71, m                                      | 52.1       | C-3', C-4'          | C-1', C-4'                   |
| 3'   | 6.46, d (6.8)                                |            | C-2'                | <u>C-1</u>                   |
| 4'   | 1.79, m<br>1.69, m                           | 40.8       | C-2', C-4', C-5'    | C-1', C-2', C-5', C-6', C-7' |
| 5'   | 1.75, m                                      | 25.1       | C-4', C-6', C-7'    | C-4', C-6'                   |
| 6'   | 0.99, d (6.5)                                | 22.2       | C-5'                | C-4', C-5', C-7'             |
| 7'   | 1.02, d(6.5)                                 | 22.8       | C-5'                | C-4', C-5', C-6'             |
| 1''  | 4.59, dd (11.5, 3.3)<br>4.08, dd (11.5, 4.6) | 65.1       | C-1'', C-2''        | C-1'                         |
| 2''  | 4.69, m                                      | 50.5       | C-1'', C-3'', C-4'' |                              |
| 3''  | 6.73, d (8.2)                                |            | C-2''               | <u>C-1'''</u>                |
| 4''  | 3.10, dd (13.6, 6.5)<br>3.01, dd (13.8, 8.2) | 37.3       | C-2'', C-4''        | C-1'', C-2'', C-5'', C-6''   |
| 5''  |                                              | 137.3      |                     |                              |
| 6''  | 7.29, m                                      | 129.3      | C-7''               | C-4'', C-6'', C-8''          |
| 7''  | 7.32, m                                      | 128.7      | C-6'', C-8''        | C-5'', C-7''                 |
| 8''  | 7.25, m                                      | 126.8      | C-7''               |                              |
| 1''' |                                              | 167.3      |                     |                              |
| 2''' |                                              | 134.3      |                     |                              |
| 3''' | 7.70, m                                      | 127.1      | C-4'''              | C-1''', C-3''', C-5'''       |
| 4''' | 7.28, m                                      | 128.4      | C-3''', C-5'''      | C-2''', C-4'''               |
| 5''' | 7.42, m                                      | 131.3      | C-4'''              | C-3'''                       |

Weak correlations are underlined.

**Supplementary Table S5:** NMR data for Asperphenamate F (**3**) and Asperphenidine F1 (**3a**) in chloroform (CDCl<sub>3</sub>).

| 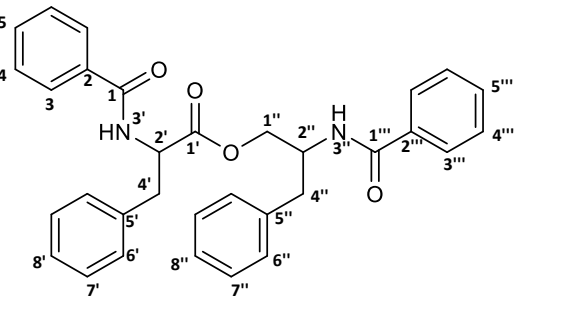 |                                              |            |  |                                              |  |
|-----------------------------------------------------------------------------------|----------------------------------------------|------------|------------------------------------------------------------------------------------|----------------------------------------------|--|
| No.                                                                               | $\delta_H$ , mult. ( <i>J</i> in Hz)         | $\delta_C$ | No.                                                                                | $\delta_H$ , mult. ( <i>J</i> in Hz)         |  |
| 1                                                                                 |                                              |            | 1                                                                                  |                                              |  |
| 2                                                                                 |                                              |            | 2                                                                                  |                                              |  |
| 3                                                                                 | 7.7, dd (8.3, 1.1)                           | 126.9      | 3                                                                                  | 7.94, m                                      |  |
| 4                                                                                 | 7.39, m                                      | 128.6      | 4                                                                                  | 7.18-7.35, m                                 |  |
| 5                                                                                 | 7.50, tt (7.5, 1.1)                          | 131.9      | 5                                                                                  | 8.72, dd (4.8, 1.5)                          |  |
| 7                                                                                 |                                              |            |                                                                                    | 8.87, d (2.0)                                |  |
| 1'                                                                                |                                              |            | 1'                                                                                 |                                              |  |
| 2'                                                                                | 4.92, q (6.6)                                | 54.4       | 2'                                                                                 | 4.96, q (6.7)                                |  |
| 3'                                                                                | 6.58, d (6.6)                                |            | 3'                                                                                 | 6.48, d                                      |  |
| 4'                                                                                | 3.29, dd (14.0, 6.6)<br>3.21, dd (14.0, 7.0) | 37.5       | 4'                                                                                 | 3.30, dd (14.1, 6.5)<br>3.21, dd (14.0, 7.0) |  |
| 5'                                                                                |                                              |            | 5'                                                                                 |                                              |  |
| 6'                                                                                | 7.21, m                                      | 129.1      | 6'                                                                                 | 7.18-7.35, m                                 |  |
| 7'                                                                                | 7.29, m                                      | 128.8      | 7'                                                                                 | 7.18-7.35, m                                 |  |
| 8'                                                                                | 7.24, m                                      | 126.7      | 8'                                                                                 | 7.18-7.35, m                                 |  |
| 1''                                                                               | 4.54, dd (11.4, 3.4)<br>4.04, dd (11.4, 4.4) | 65.3       | 1''                                                                                | 4.51, dd (11.4, 3.5)<br>4.09, dd (11.4, 4.1) |  |
| 2''                                                                               | 4.62, m                                      | 50.2       | 2''                                                                                | 4.63, m                                      |  |
| 3''                                                                               | 6.67, d (8.4)                                |            | 3''                                                                                | 6.59, d                                      |  |
| 4''                                                                               | 3.00, dd (13.7, 6.4)<br>2.89, dd (13.8, 8.5) | 37.2       | 4''                                                                                | 3.00, dd (13.8, 6.5)<br>2.90, dd (13.8, 8.1) |  |
| 5''                                                                               |                                              |            | 5''                                                                                |                                              |  |
| 6''                                                                               | 7.23, m                                      | 129.2      | 6''                                                                                | 7.18-7.35, m                                 |  |
| 7''                                                                               | 7.32, m                                      | 128.3      | 7''                                                                                | 7.18-7.35, m                                 |  |
| 8''                                                                               | 7.25, m                                      | 127.3      | 8''                                                                                | 7.18-7.35, m                                 |  |
| 1'''                                                                              |                                              |            | 1'''                                                                               |                                              |  |
| 2'''                                                                              |                                              |            | 2'''                                                                               |                                              |  |
| 3'''                                                                              | 7.65, dd (8.3, 1.1)                          | 127.0      | 3'''                                                                               | 7.66, dd (8.3, 1.0)                          |  |
| 4'''                                                                              | 7.31, m                                      | 128.6      | 4'''                                                                               | 7.18-7.35, m                                 |  |
| 5'''                                                                              | 7.43, tt (7.5, 1.1)                          | 131.3      | 5'''                                                                               | 7.45, m                                      |  |

**Supplementary Figure S1: NMR spectra for Asperphenamate F (3).**

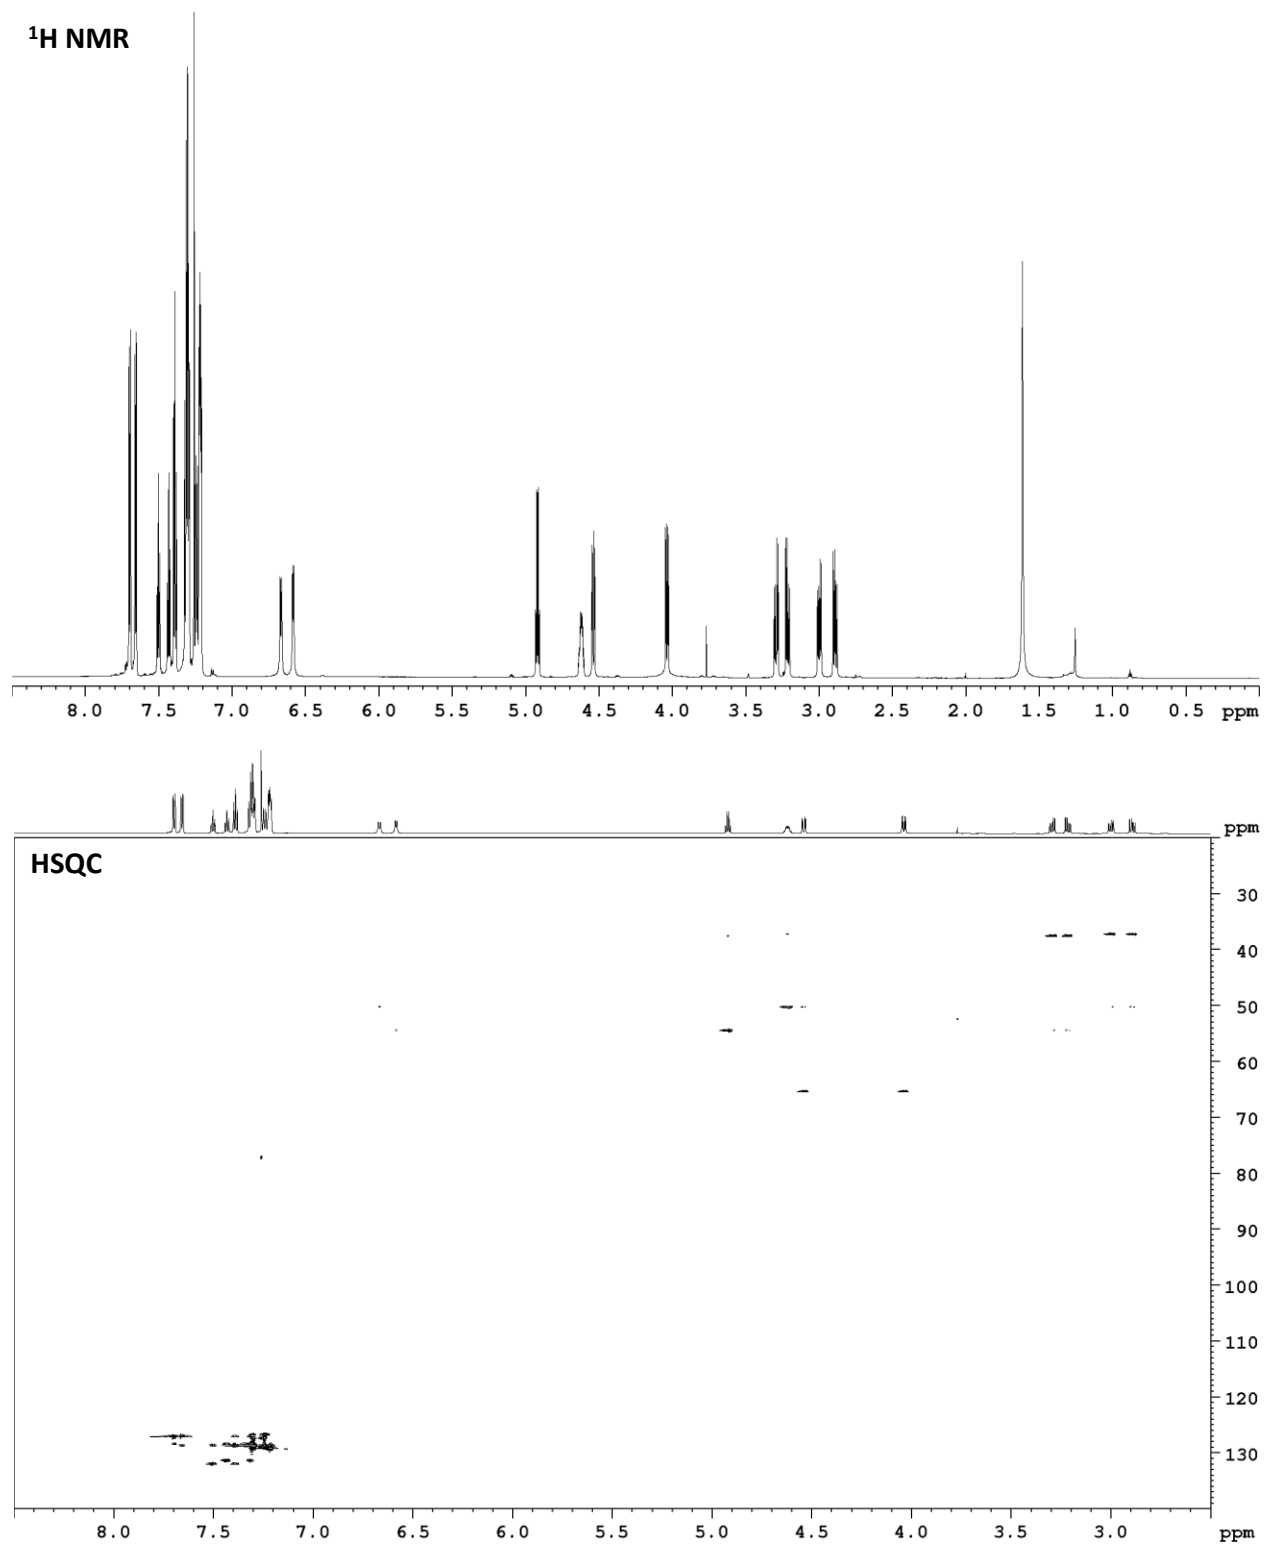





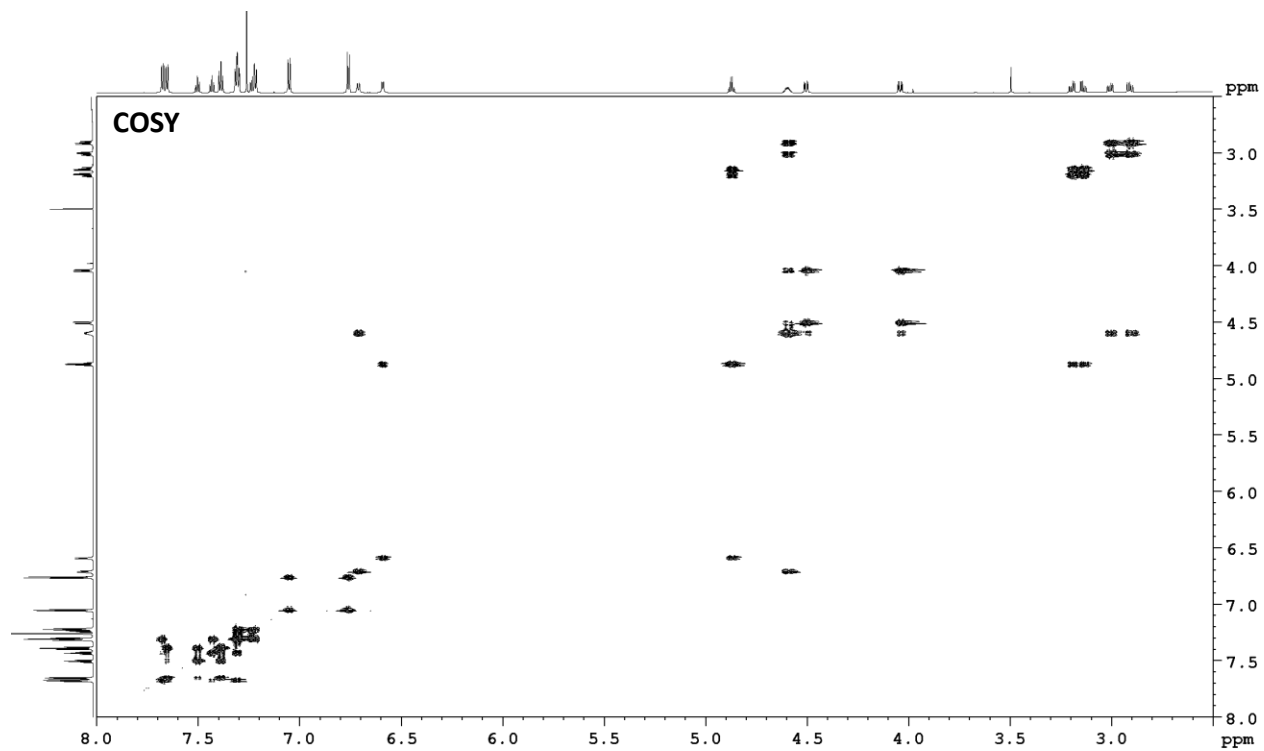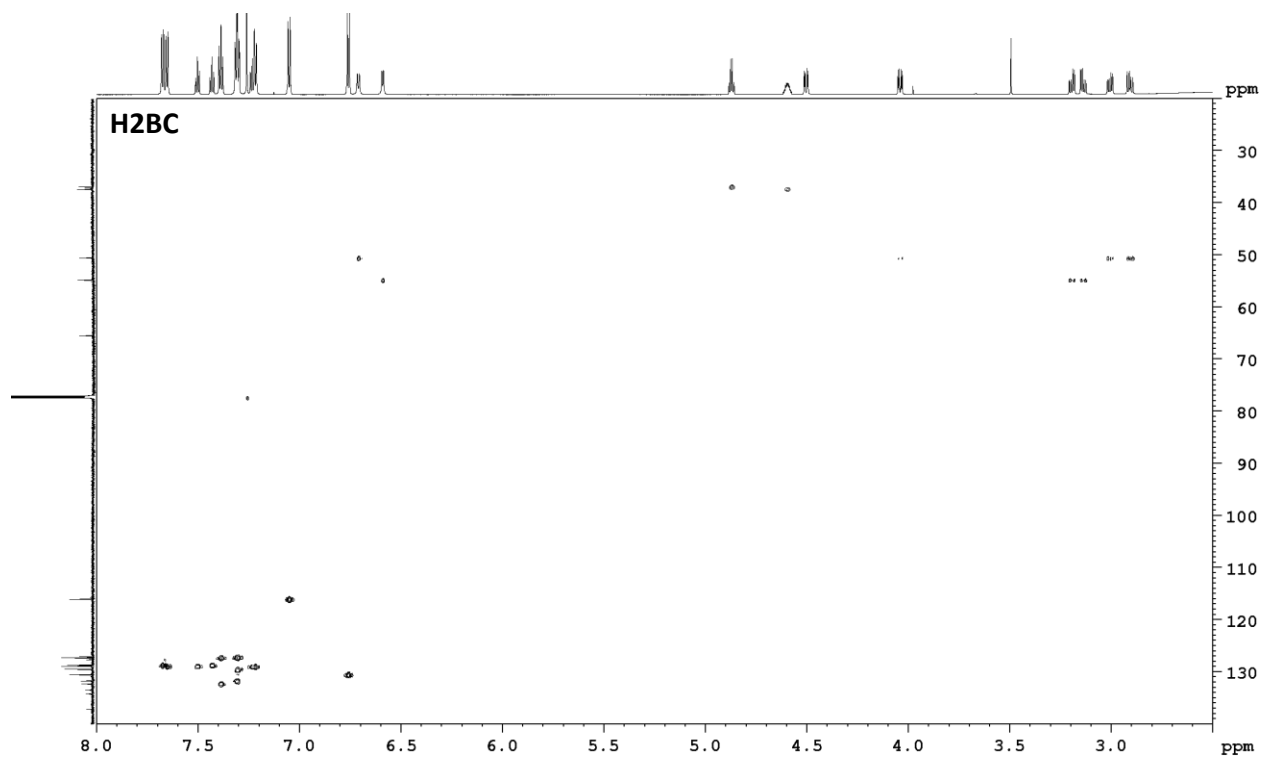

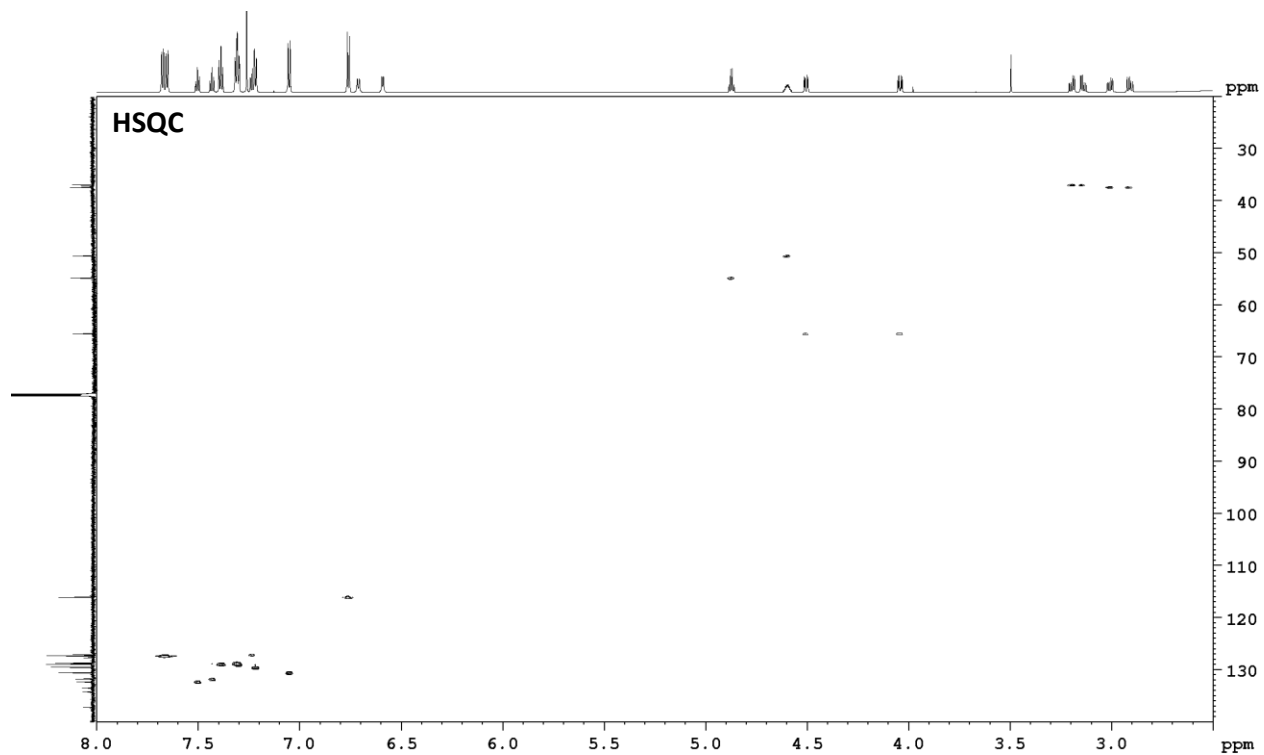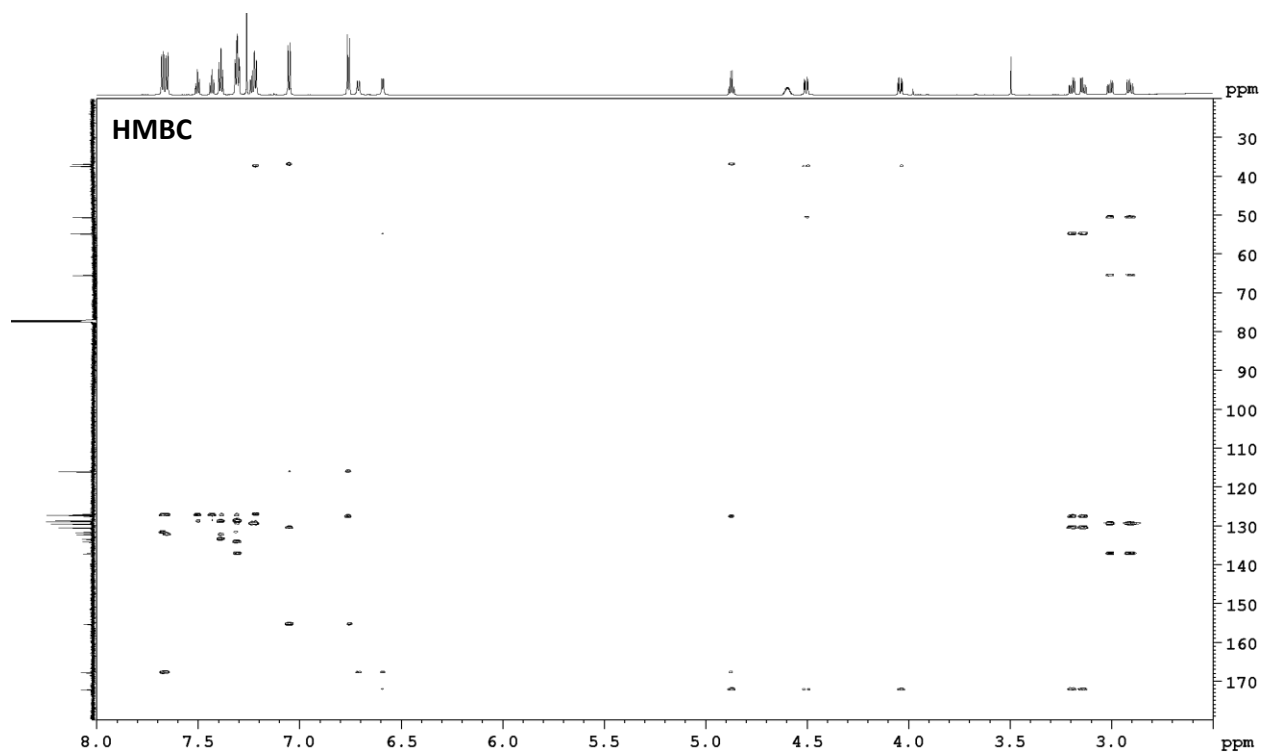

Supplementary Figure S3: NMR spectra for Asperphenamate W (12).

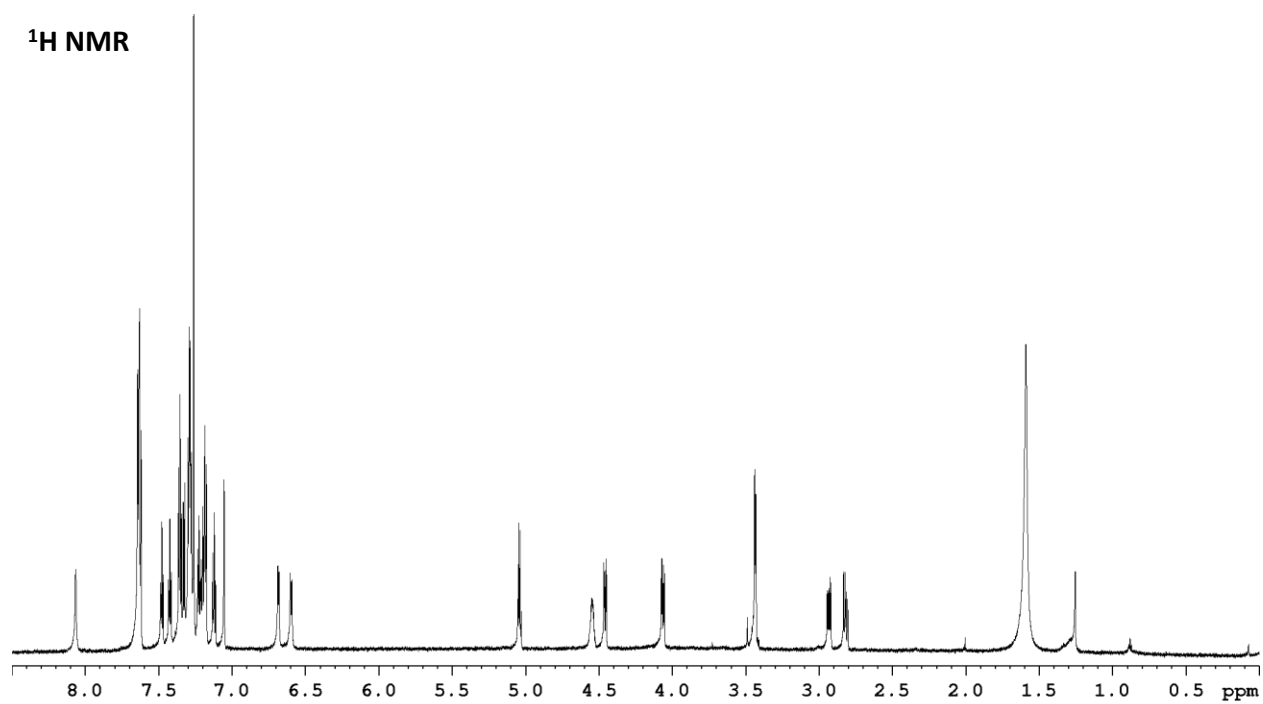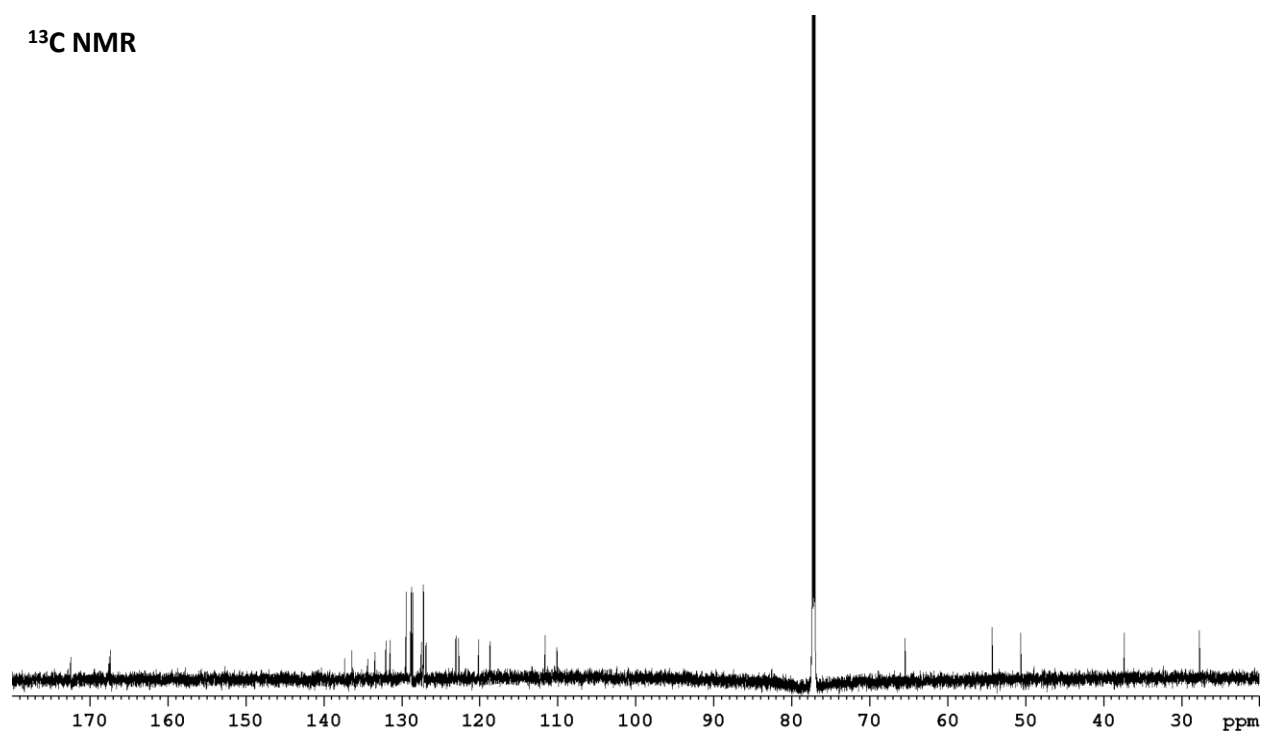

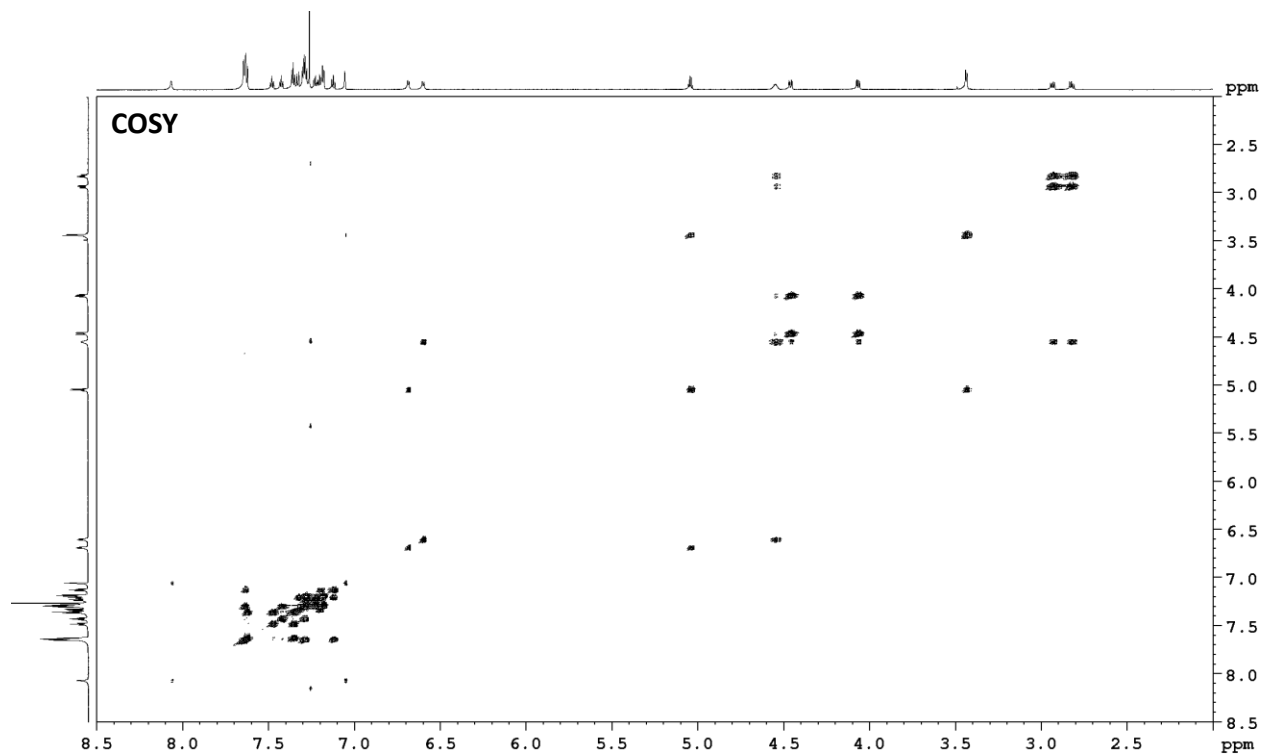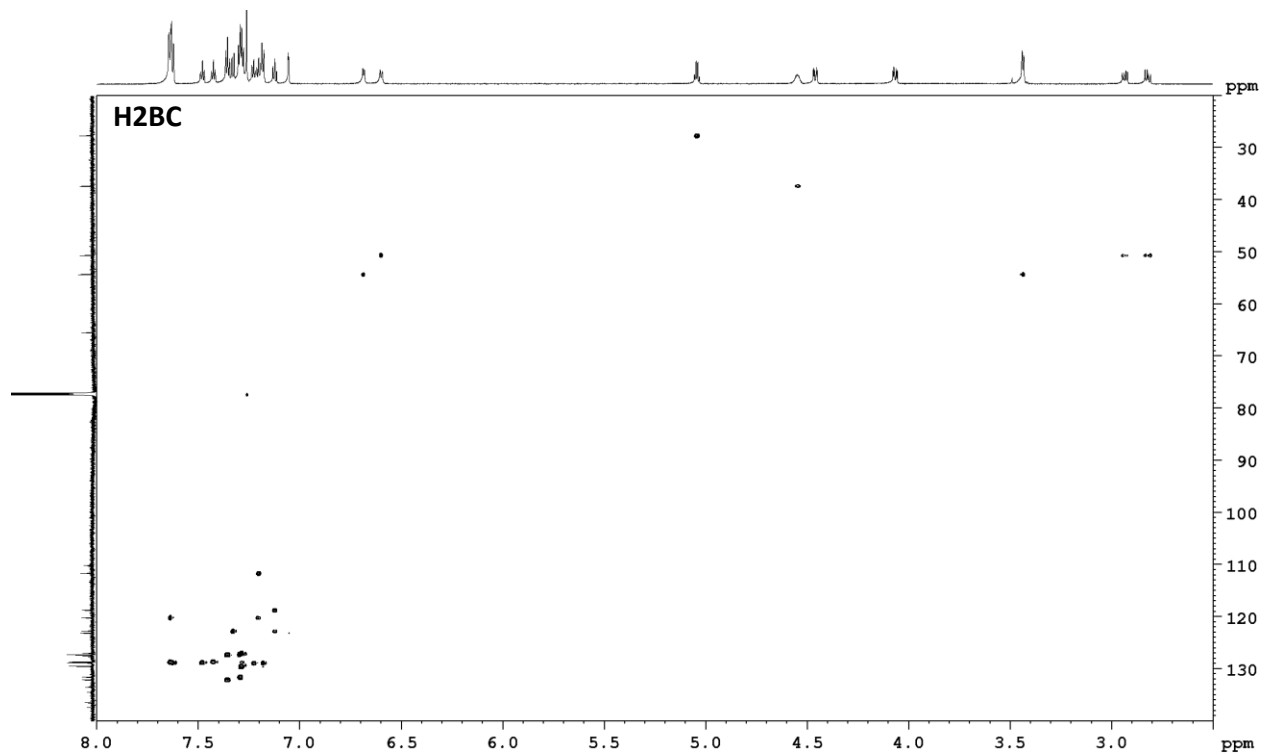

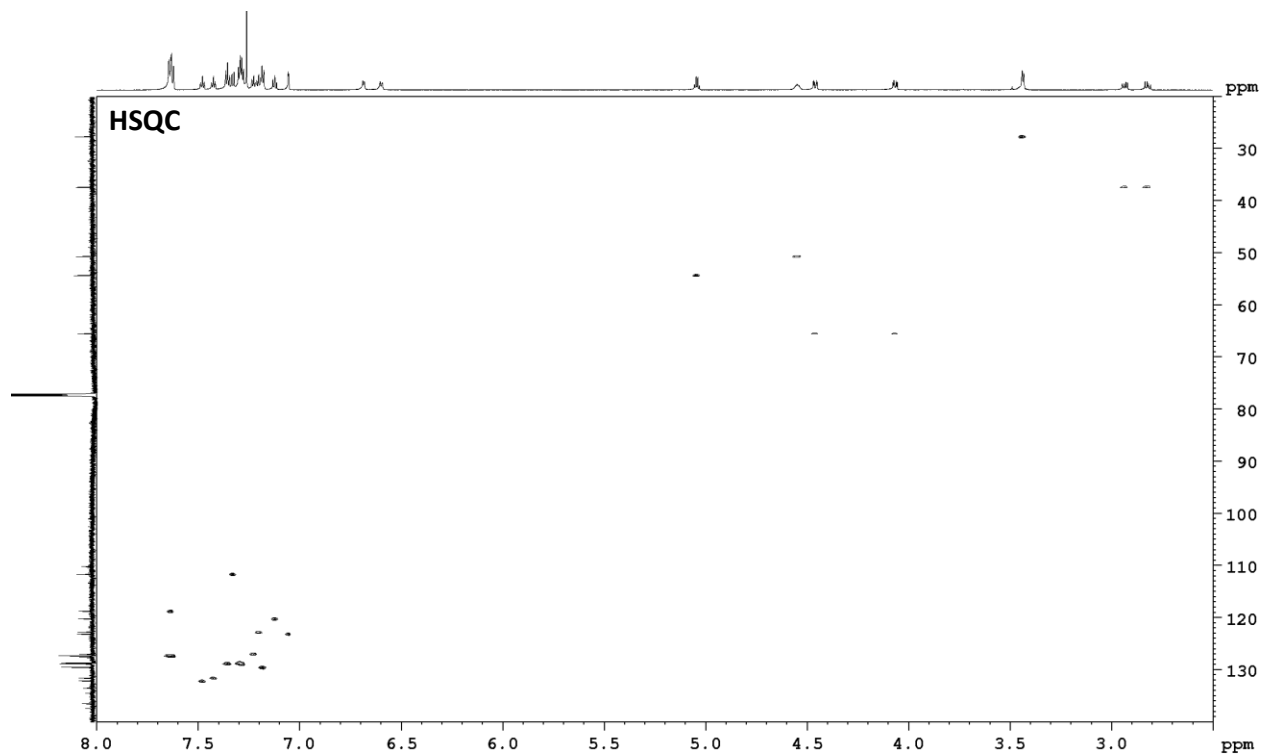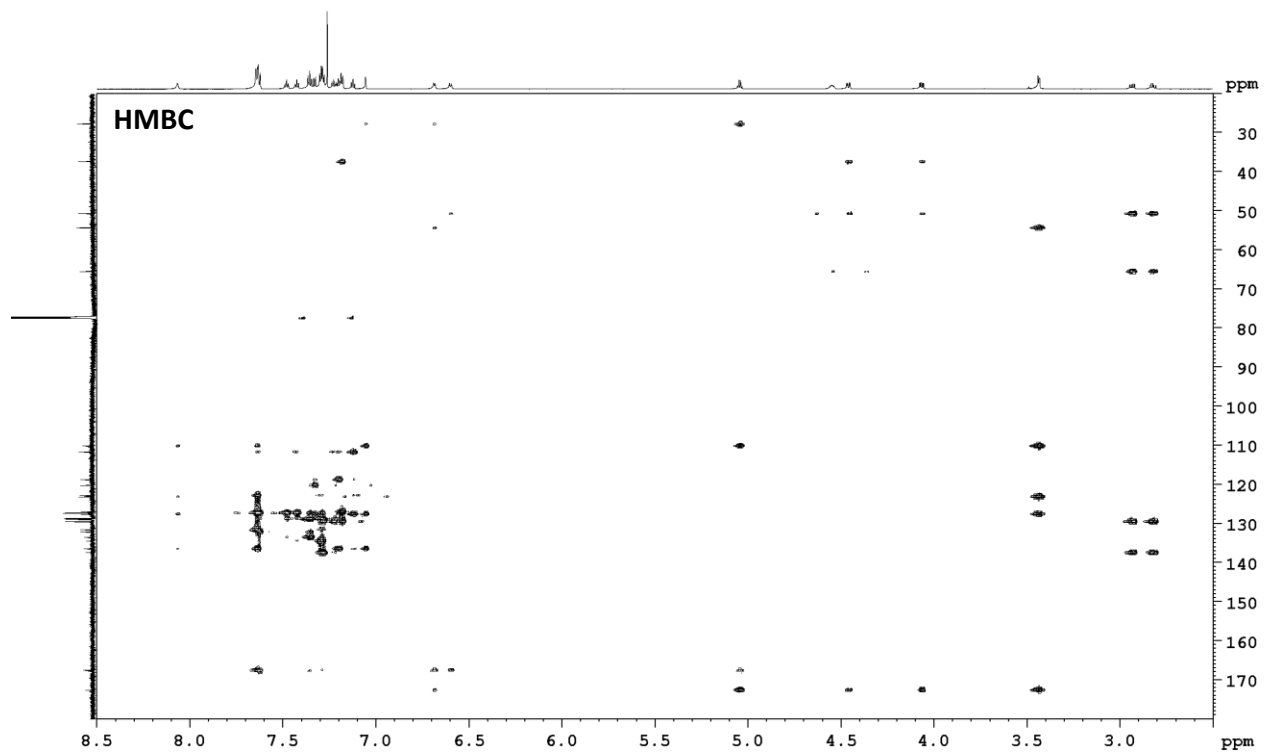



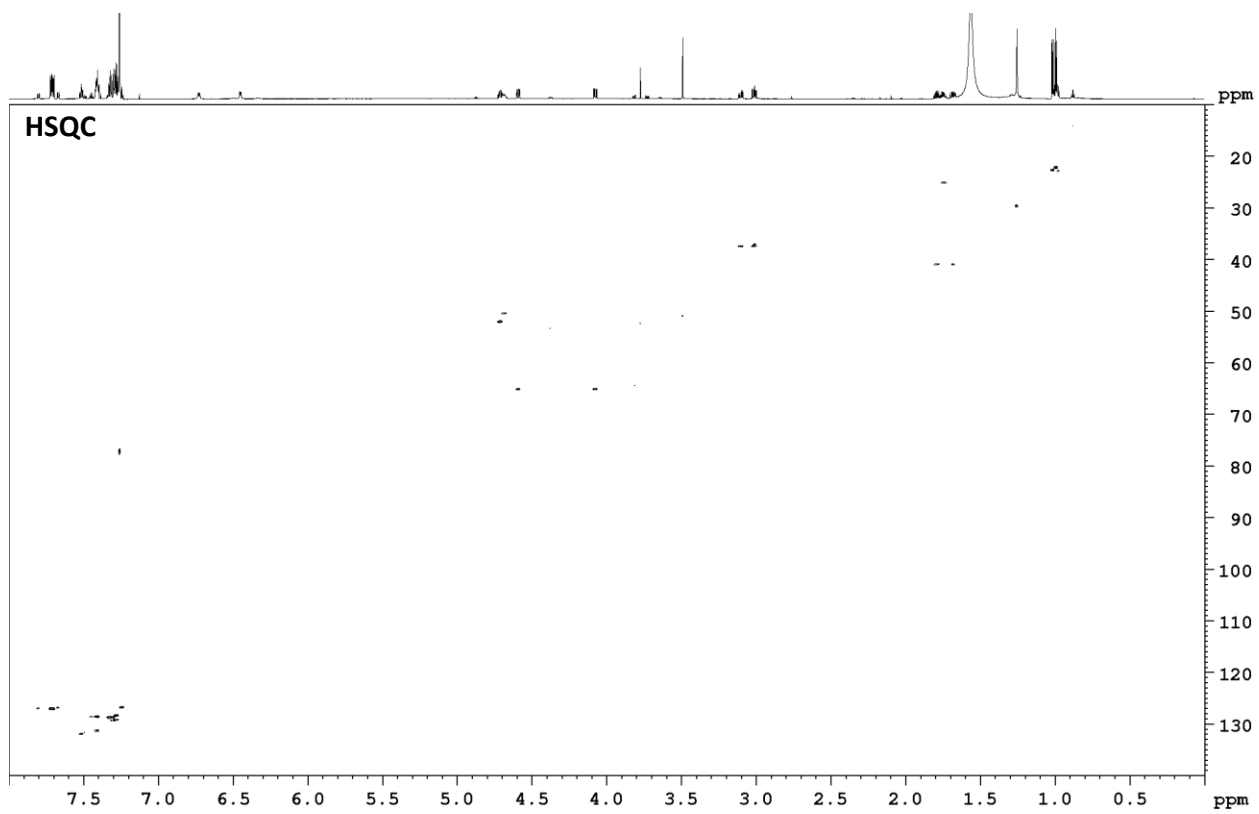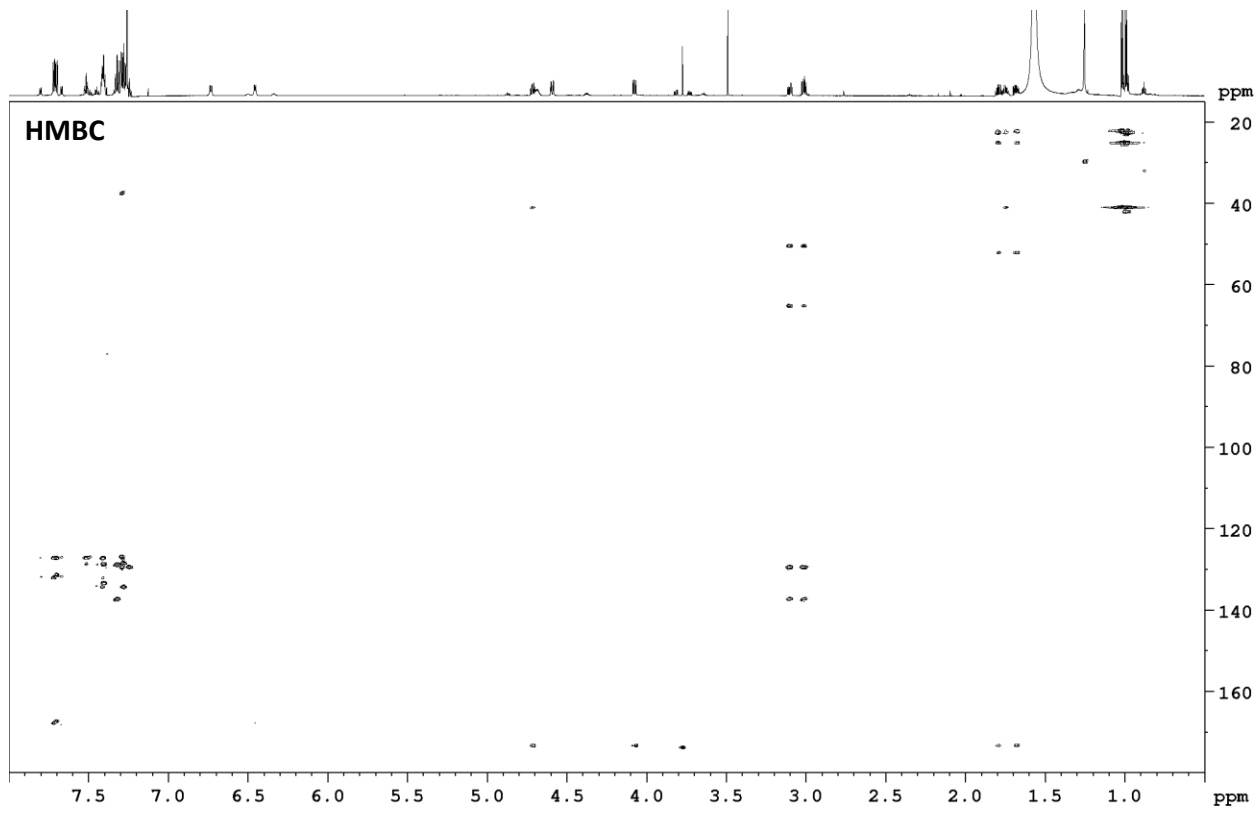

Supplementary Figure S5:  $^1\text{H}$  NMR spectrum for Asperphenidine F1 (**3a**).

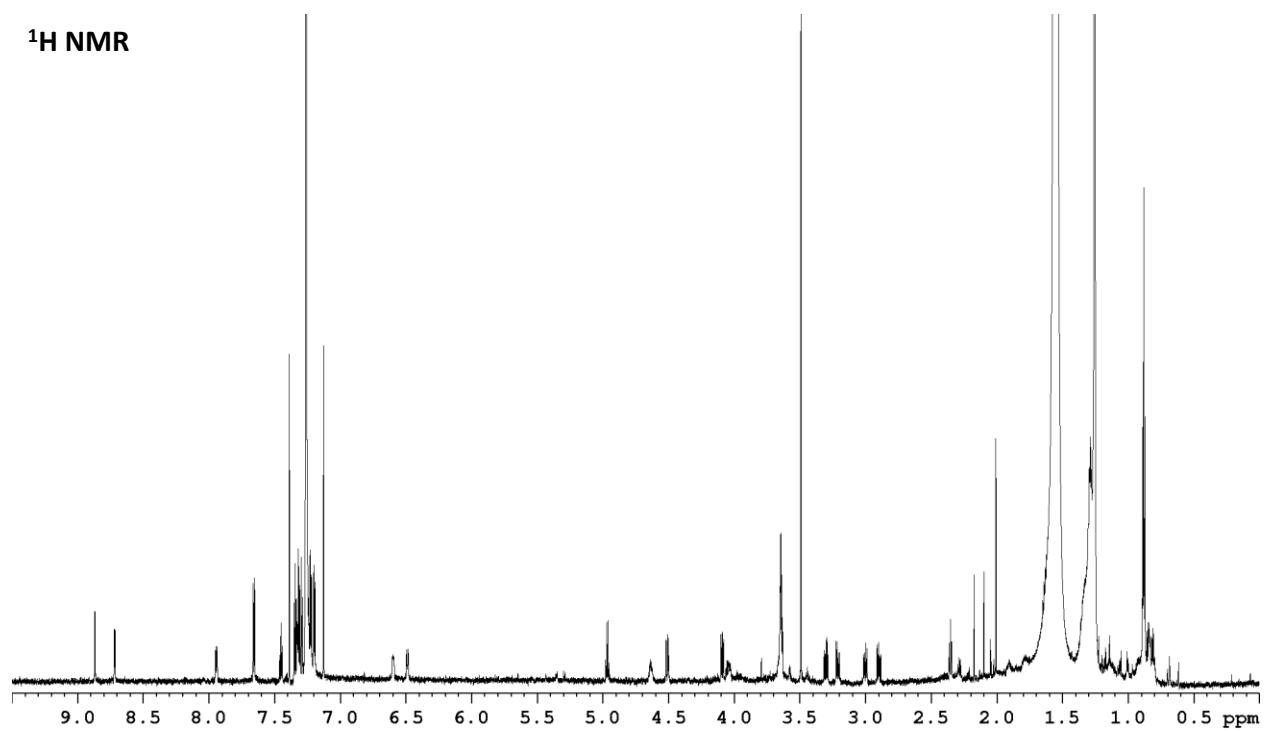



**Supplementary Figure S6: MS/MS spectra and assignment of natural Asperphenamate analogues. (A) valine, (B) methionine, (C) histidine, and (D) double leucine exchange analogues.**

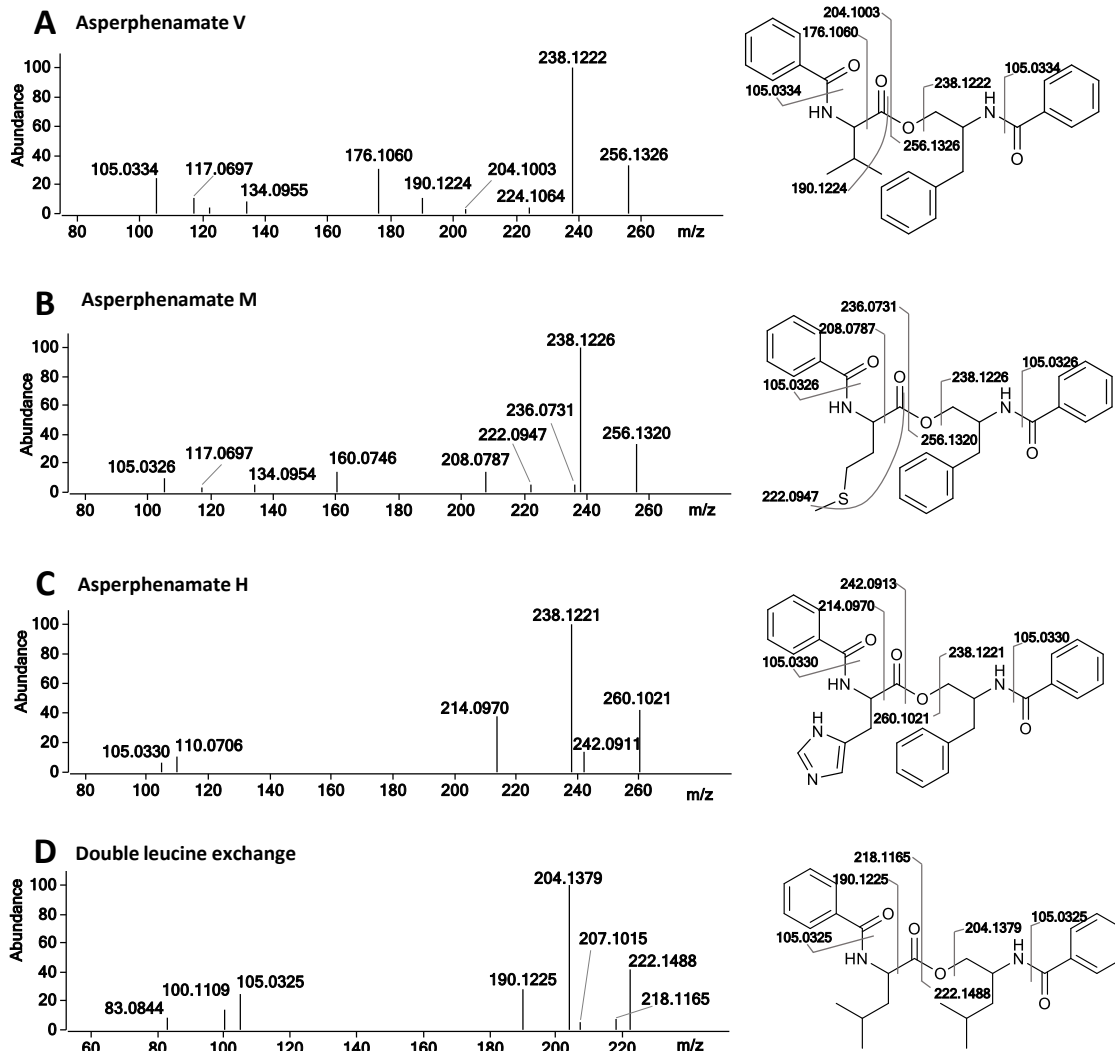

**Supplementary Figure S7: MS/MS spectra and assignment of Asperphenidines Y1-Y2 (A) and W1-W2 (B). Fragment values highlighted in green correspond to nicotinic acid incorporation in the non-reduced amino acid moiety, whereas fragment values highlighted in blue correspond to nicotinic acid incorporation in the reduced amino acid moiety.**

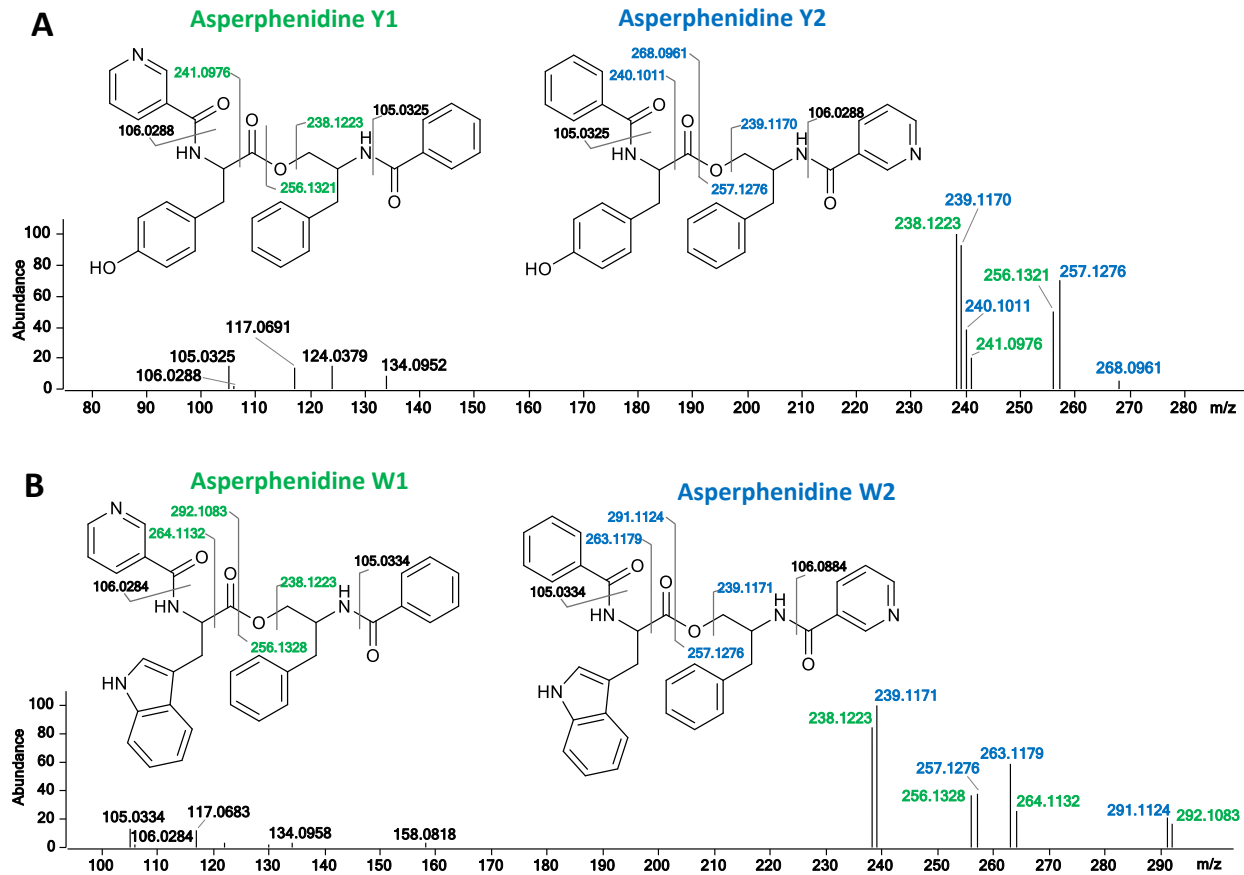

**Supplementary Figure S8: MS/MS spectra and assignment of chloro- and bromo- phenylalanine asperphenamate derivatives, with single (A) and double (B) p-chloro-phenylalanine, and single (C) and double (D) p-bromo-phenylalanine incorporation. Fragment values highlighted in green correspond to substituted amino acid incorporation in the non-reduced amino acid moiety, whereas fragment values highlighted in blue correspond to substituted amino acid incorporation in the reduced amino acid moiety.**

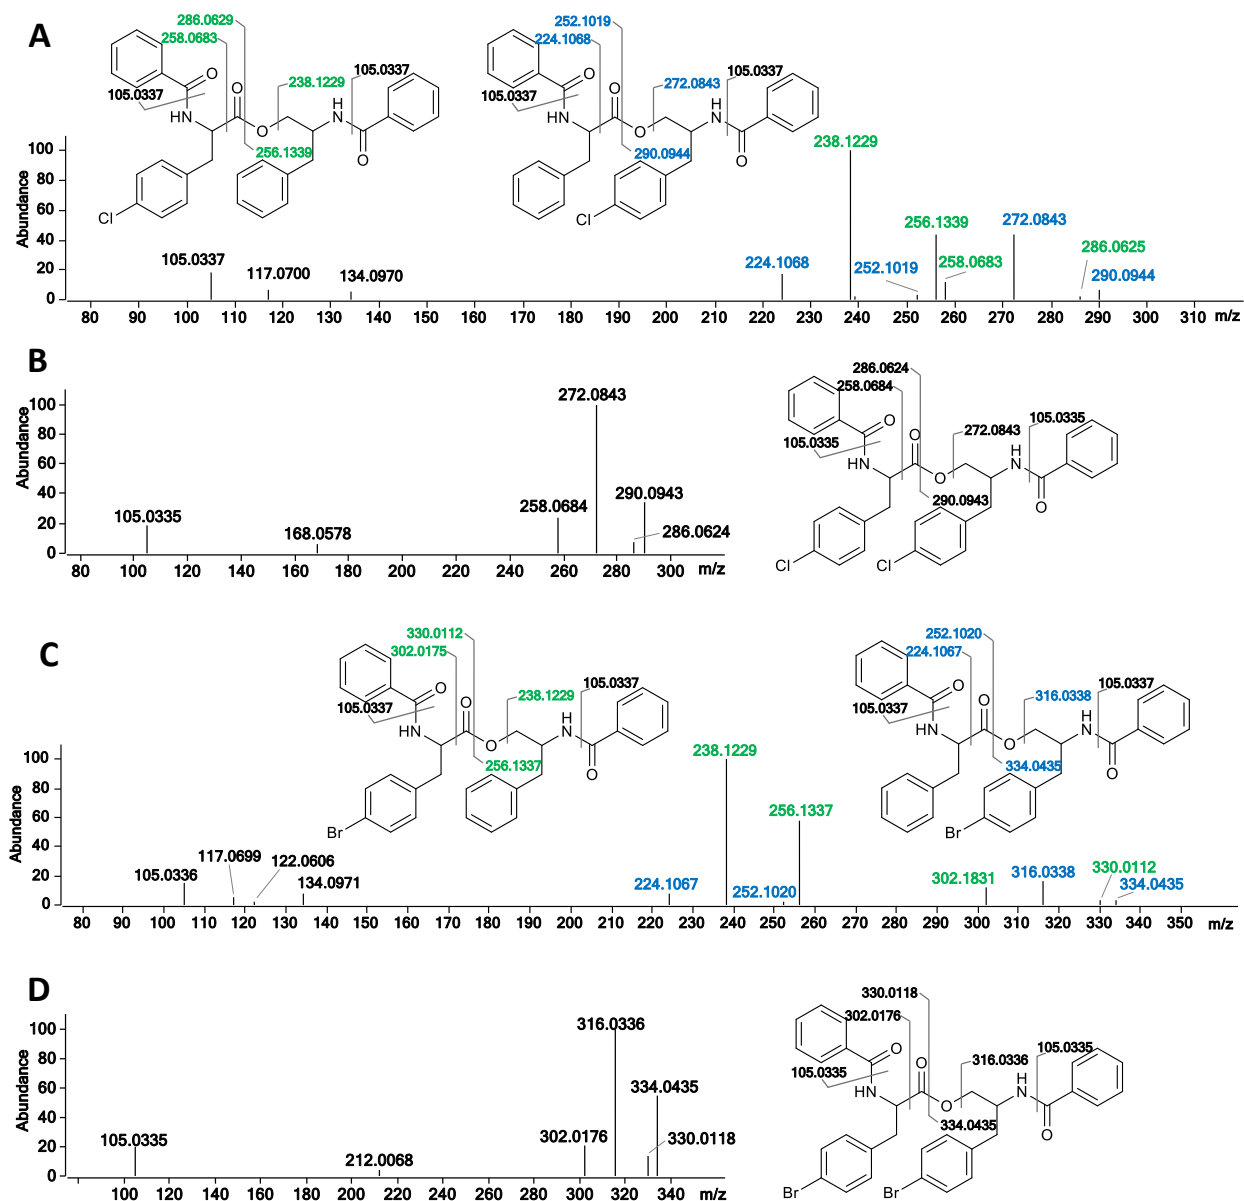

**Supplementary Figure S9:** MS/MS spectra and assignment of amino- and nitro- phenylalanine asperphenamate derivatives, with single substituted amino acid incorporation as well as corresponding asperphenidine analogues for p-amino-phenylalanine (AB/C) and p-nitro-phenylalanine (D/E). Fragment values highlighted in green correspond to nicotinic acid incorporation in the non-reduced amino acid moiety, whereas fragment values highlighted in blue correspond to nicotinic acid incorporation in the reduced amino acid moiety.

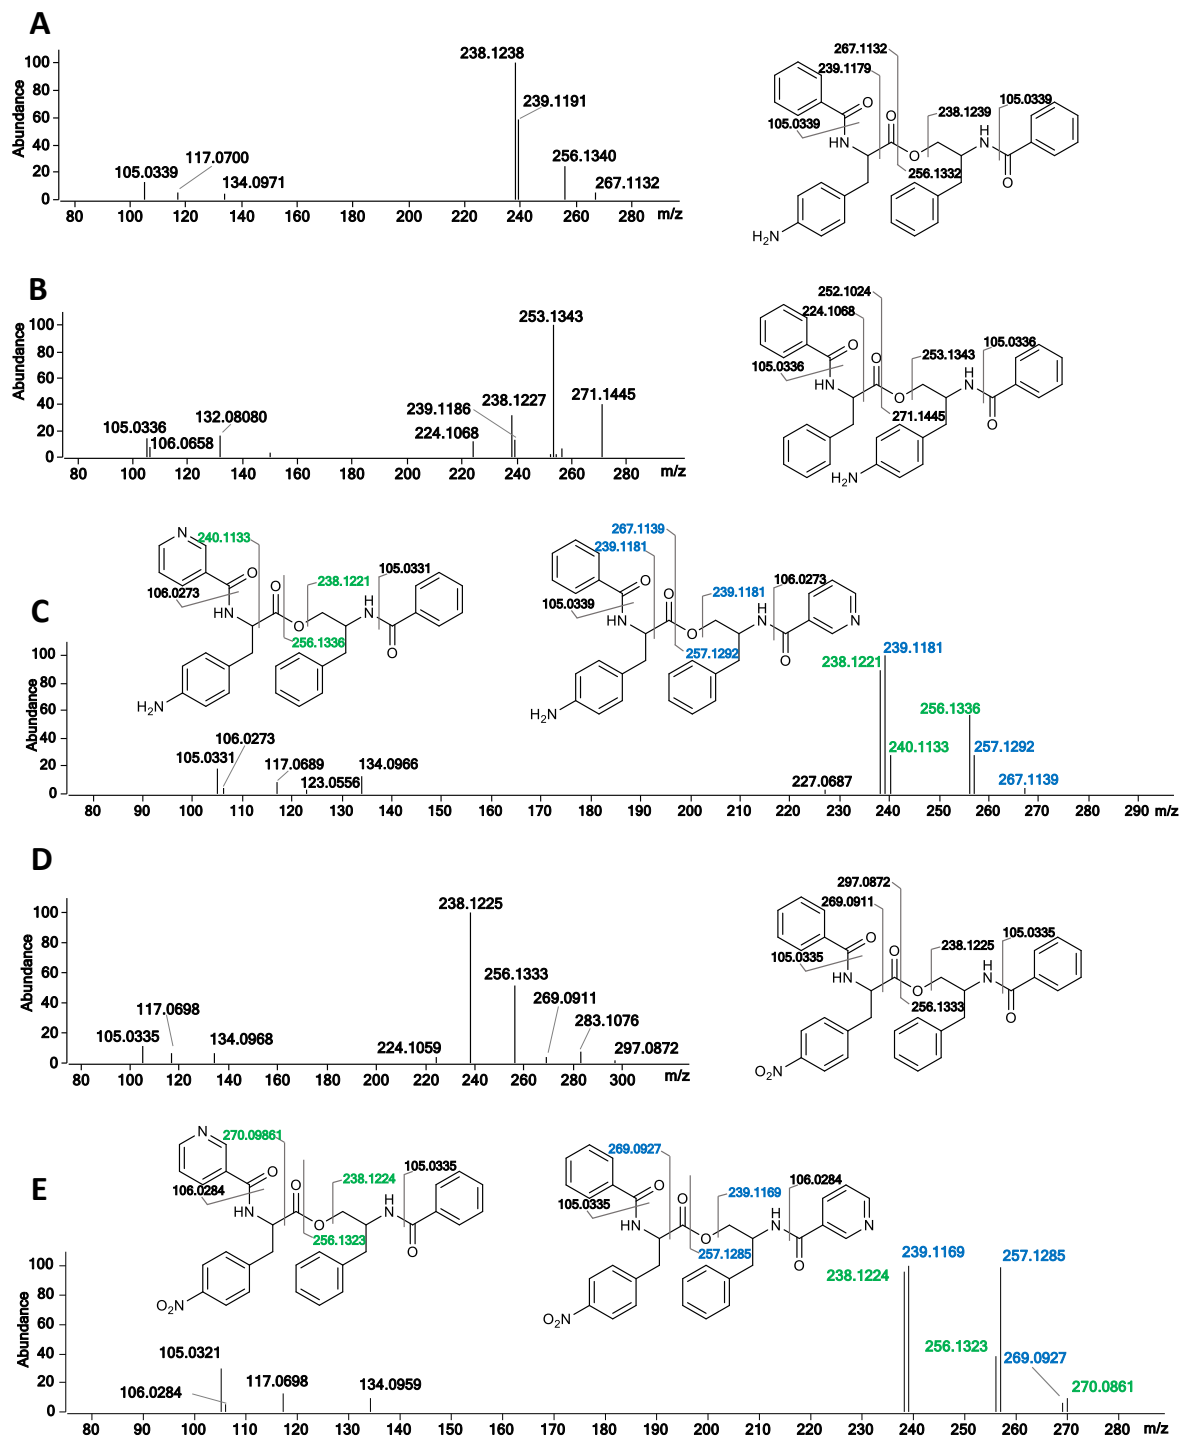

**Supplementary Figure S10:** BPCs of selected fungi from *Brevicompacta* section grown on YES media. Shaded peaks are EIC of  $[M+H]^+$  adducts of most abundant asperphenamate analogues:  $m/z$  508.2231 (red),  $m/z$  523.2227 (green),  $m/z$  546.2387 (yellow),  $m/z$  473.2435 (blue) and  $m/z$  507.2278 (grey). The numbers correspond to characterized asperphenamate analogues.

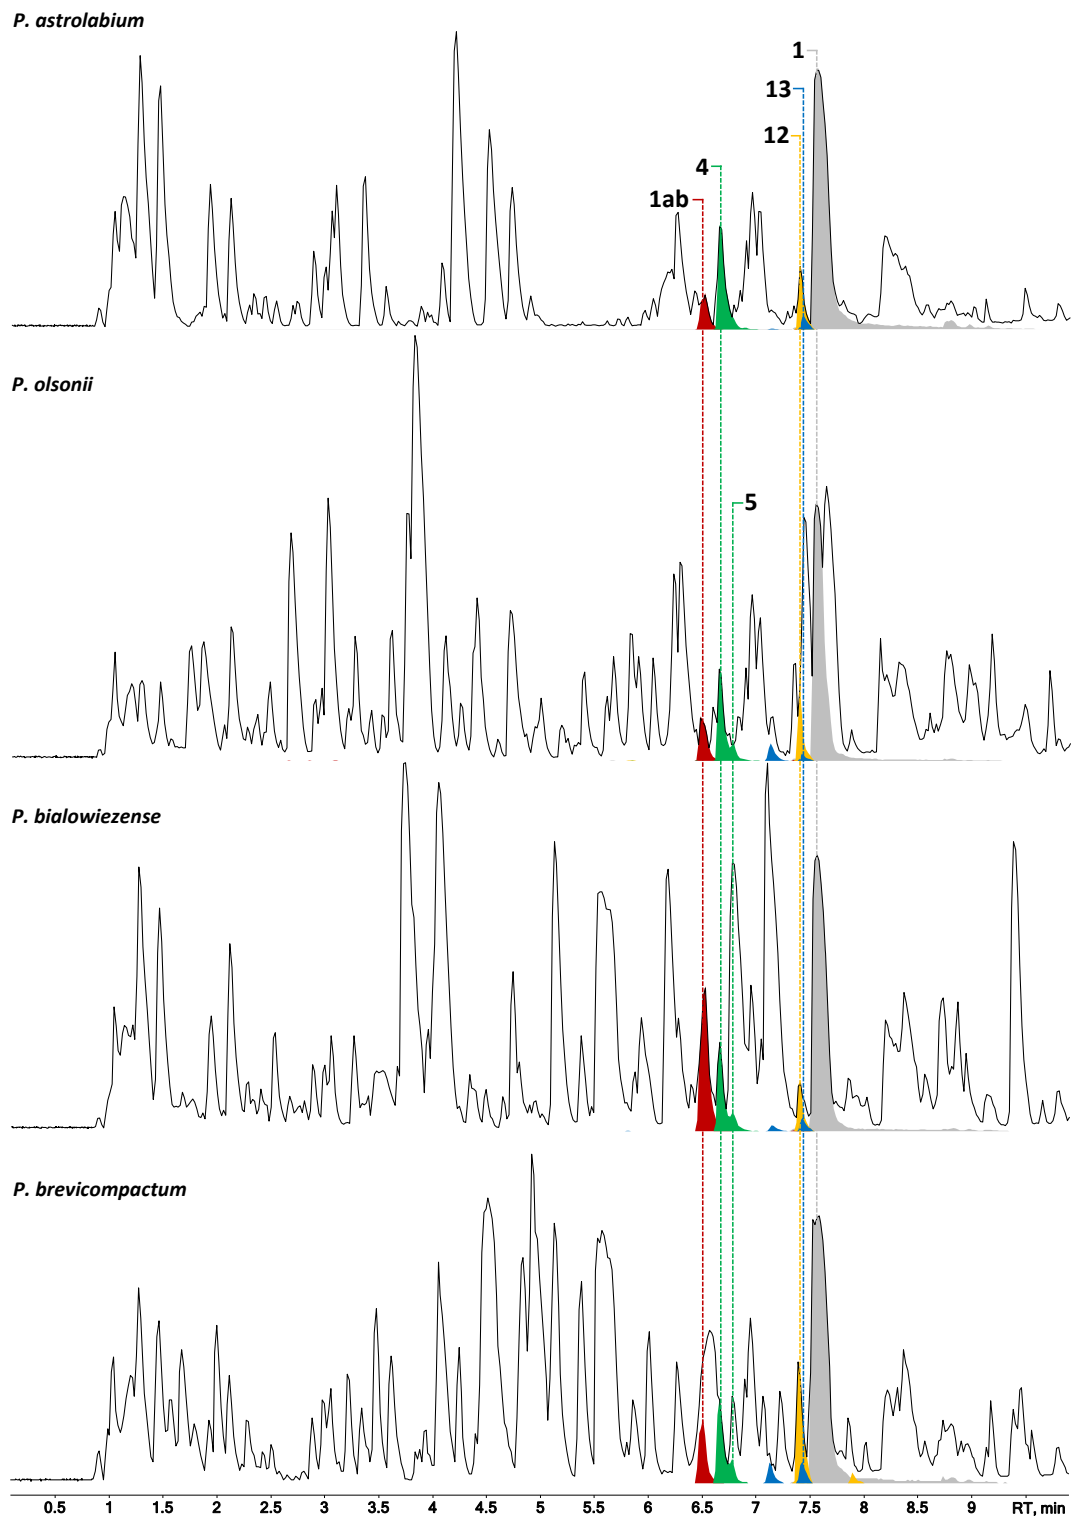

Supplement: Data_Sheet_1.pdf [file Data_Sheet_1.pdf]
